# Supplementary material for: Metabolic Profiling of Plasma in Patients with Irritable Bowel Syndrome after a 4-Week Starch- and Sucrose-Reduced Diet
Source: MDPI journal article supplement (doi:10.3390/metabo11070440), 2021-07-04
Supplement: s1 [file s1]

## Supplementary Materials

### A) Baseline data

Pearson Correlation (*r*)

|                                             | Age  | BMI  | Energy kcal | Protein | Fat  | Carbohydrates | Fibers | Sugars | Sucrose | Starch | Alcohol | Monosaccharides | Disaccharides | Saturated fat | Monounsaturated fat | Polysaturated fat | Total IBS-SSS | Abdominal pain | Diarrhea | Constipation | Bloating and flatulence | Vomiting and nausea | Psychological well-being | Intestinal symptoms influence on daily life |
|---------------------------------------------|------|------|-------------|---------|------|---------------|--------|--------|---------|--------|---------|-----------------|---------------|---------------|---------------------|-------------------|---------------|----------------|----------|--------------|-------------------------|---------------------|--------------------------|---------------------------------------------|
| Age                                         | 0.1  | -0.1 | -0.1        | -0.1    | -0.1 | -0.1          | -0.1   | -0.1   | -0.1    | -0.1   | -0.1    | -0.1            | -0.1          | -0.1          | -0.1                | -0.1              | -0.1          | -0.1           | -0.1     | -0.1         | -0.1                    | -0.1                | -0.1                     | -0.1                                        |
| BMI                                         | 0.1  | -0.1 | -0.1        | -0.1    | -0.1 | -0.1          | -0.1   | -0.1   | -0.1    | -0.1   | -0.1    | -0.1            | -0.1          | -0.1          | -0.1                | -0.1              | -0.1          | -0.1           | -0.1     | -0.1         | -0.1                    | -0.1                | -0.1                     | -0.1                                        |
| Energy kcal                                 | -0.1 | -0.1 | 0.65        | 0.87    | 0.82 | 0.51          | 0.38   | 0.43   | 0.62    | 0.1    | 0.1     | 0.1             | 0.1           | 0.1           | 0.1                 | 0.1               | 0.1           | 0.1            | 0.1      | 0.1          | 0.1                     | 0.1                 | 0.1                      | 0.1                                         |
| Protein                                     | -0.1 | -0.1 | 0.65        | 0.54    | 0.36 | 0.25          | 0.1    | 0.1    | 0.40    | 0.1    | 0.1     | 0.1             | 0.1           | 0.1           | 0.1                 | 0.1               | 0.1           | 0.1            | 0.1      | 0.1          | 0.1                     | 0.1                 | 0.1                      | 0.1                                         |
| Fat                                         | -0.1 | -0.1 | 0.87        | 0.54    | 0.49 | 0.33          | 0.2    | 0.22   | 0.38    | 0.1    | 0.1     | 0.1             | 0.1           | 0.1           | 0.1                 | 0.1               | 0.1           | 0.1            | 0.1      | 0.1          | 0.1                     | 0.1                 | 0.1                      | 0.1                                         |
| Carbohydrates                               | -0.1 | -0.1 | 0.82        | 0.36    | 0.49 | 0.51          | 0.58   | 0.63   | 0.70    | 0.1    | 0.1     | 0.1             | 0.1           | 0.1           | 0.1                 | 0.1               | 0.1           | 0.1            | 0.1      | 0.1          | 0.1                     | 0.1                 | 0.1                      | 0.1                                         |
| Fibers                                      | -0.1 | -0.1 | 0.51        | 0.25    | 0.33 | 0.51          | 0.23   | 0.1    | 0.40    | 0.1    | 0.1     | 0.1             | 0.1           | 0.1           | 0.1                 | 0.1               | 0.1           | 0.1            | 0.1      | 0.1          | 0.1                     | 0.1                 | 0.1                      | 0.1                                         |
| Sugars                                      | -0.1 | -0.1 | 0.38        | 0.1     | 0.2  | 0.58          | 0.23   | 0.70   | 0.1     | 0.1    | 0.1     | 0.1             | 0.1           | 0.1           | 0.1                 | 0.1               | 0.1           | 0.1            | 0.1      | 0.1          | 0.1                     | 0.1                 | 0.1                      | 0.1                                         |
| Sucrose                                     | -0.1 | -0.1 | 0.43        | 0.1     | 0.22 | 0.63          | 0.1    | 0.70   | 0.1     | 0.1    | 0.1     | 0.1             | 0.1           | 0.1           | 0.1                 | 0.1               | 0.1           | 0.1            | 0.1      | 0.1          | 0.1                     | 0.1                 | 0.1                      | 0.1                                         |
| Starch                                      | -0.1 | -0.1 | 0.62        | 0.40    | 0.38 | 0.70          | 0.40   | 0.1    | 0.1     | 0.1    | 0.1     | 0.1             | 0.1           | 0.1           | 0.1                 | 0.1               | 0.1           | 0.1            | 0.1      | 0.1          | 0.1                     | 0.1                 | 0.1                      | 0.1                                         |
| Alcohol                                     | -0.1 | -0.1 | 0.2         | 0.1     | 0    | 0             | 0.2    | -0.1   | -0.1    | -0.1   | -0.1    | -0.1            | -0.1          | -0.1          | -0.1                | -0.1              | -0.1          | -0.1           | -0.1     | -0.1         | -0.1                    | -0.1                | -0.1                     | -0.1                                        |
| Monosaccharides                             | -0.1 | -0.1 | 0.35        | 0.1     | 0.1  | 0.51          | 0.52   | 0.46   | 0.2     | 0.22   | 0.1     | 0.1             | 0.1           | 0.1           | 0.1                 | 0.1               | 0.1           | 0.1            | 0.1      | 0.1          | 0.1                     | 0.1                 | 0.1                      | 0.1                                         |
| Disaccharides                               | -0.1 | -0.1 | 0.52        | 0.1     | 0.30 | 0.70          | 0.2    | 0.72   | 0.92    | 0.22   | 0.1     | 0.1             | 0.1           | 0.1           | 0.1                 | 0.1               | 0.1           | 0.1            | 0.1      | 0.1          | 0.1                     | 0.1                 | 0.1                      | 0.1                                         |
| Saturated fat                               | -0.1 | -0.1 | 0.80        | 0.5     | 0.91 | 0.47          | 0.2    | 0.18   | 0.24    | 0.37   | 0.1     | 0.1             | 0.1           | 0.1           | 0.1                 | 0.1               | 0.1           | 0.1            | 0.1      | 0.1          | 0.1                     | 0.1                 | 0.1                      | 0.1                                         |
| Monounsaturated fat                         | -0.1 | -0.1 | 0.80        | 0.5     | 0.94 | 0.43          | 0.3    | 0.14   | 0.20    | 0.29   | 0.1     | 0.1             | 0.1           | 0.1           | 0.1                 | 0.1               | 0.1           | 0.1            | 0.1      | 0.1          | 0.1                     | 0.1                 | 0.1                      | 0.1                                         |
| Polysaturated fat                           | -0.1 | -0.1 | 0.64        | 0.4     | 0.73 | 0.35          | 0.4    | 0.12   | 0.11    | 0.30   | 0.1     | 0.1             | 0.1           | 0.1           | 0.1                 | 0.1               | 0.1           | 0.1            | 0.1      | 0.1          | 0.1                     | 0.1                 | 0.1                      | 0.1                                         |
| Total IBS-SSS                               | -0.1 | -0.1 | -0.1        | -0.1    | -0.1 | -0.1          | -0.1   | -0.1   | -0.1    | -0.1   | -0.1    | -0.1            | -0.1          | -0.1          | -0.1                | -0.1              | -0.1          | -0.1           | -0.1     | -0.1         | -0.1                    | -0.1                | -0.1                     | -0.1                                        |
| Abdominal pain                              | -0.1 | -0.1 | -0.1        | -0.1    | -0.1 | -0.1          | -0.1   | -0.1   | -0.1    | -0.1   | -0.1    | -0.1            | -0.1          | -0.1          | -0.1                | -0.1              | -0.1          | -0.1           | -0.1     | -0.1         | -0.1                    | -0.1                | -0.1                     | -0.1                                        |
| Diarrhea                                    | -0.1 | -0.1 | -0.1        | -0.1    | -0.1 | -0.1          | -0.1   | -0.1   | -0.1    | -0.1   | -0.1    | -0.1            | -0.1          | -0.1          | -0.1                | -0.1              | -0.1          | -0.1           | -0.1     | -0.1         | -0.1                    | -0.1                | -0.1                     | -0.1                                        |
| Constipation                                | -0.1 | -0.1 | -0.1        | -0.1    | -0.1 | -0.1          | -0.1   | -0.1   | -0.1    | -0.1   | -0.1    | -0.1            | -0.1          | -0.1          | -0.1                | -0.1              | -0.1          | -0.1           | -0.1     | -0.1         | -0.1                    | -0.1                | -0.1                     | -0.1                                        |
| Bloating and flatulence                     | -0.1 | -0.1 | -0.1        | -0.1    | -0.1 | -0.1          | -0.1   | -0.1   | -0.1    | -0.1   | -0.1    | -0.1            | -0.1          | -0.1          | -0.1                | -0.1              | -0.1          | -0.1           | -0.1     | -0.1         | -0.1                    | -0.1                | -0.1                     | -0.1                                        |
| Vomiting and nausea                         | -0.1 | -0.1 | -0.1        | -0.1    | -0.1 | -0.1          | -0.1   | -0.1   | -0.1    | -0.1   | -0.1    | -0.1            | -0.1          | -0.1          | -0.1                | -0.1              | -0.1          | -0.1           | -0.1     | -0.1         | -0.1                    | -0.1                | -0.1                     | -0.1                                        |
| Psychological well-being                    | -0.1 | -0.1 | -0.1        | -0.1    | -0.1 | -0.1          | -0.1   | -0.1   | -0.1    | -0.1   | -0.1    | -0.1            | -0.1          | -0.1          | -0.1                | -0.1              | -0.1          | -0.1           | -0.1     | -0.1         | -0.1                    | -0.1                | -0.1                     | -0.1                                        |
| Intestinal symptoms influence on daily life | -0.1 | -0.1 | -0.1        | -0.1    | -0.1 | -0.1          | -0.1   | -0.1   | -0.1    | -0.1   | -0.1    | -0.1            | -0.1          | -0.1          | -0.1                | -0.1              | -0.1          | -0.1           | -0.1     | -0.1         | -0.1                    | -0.1                | -0.1                     | -0.1                                        |

### B) 4-weeks data

Pearson Correlation (*r*)

|                                             | Age  | BMI  | Energy kcal | Protein | Fat  | Carbohydrates | Fibers | Sugars | Sucrose | Starch | Alcohol | Monosaccharides | Disaccharides | Saturated fat | Monounsaturated fat | Polysaturated fat | Total IBS-SSS | Abdominal pain | Diarrhea | Constipation | Bloating and flatulence | Vomiting and nausea | Psychological well-being | Intestinal symptoms influence on daily life |
|---------------------------------------------|------|------|-------------|---------|------|---------------|--------|--------|---------|--------|---------|-----------------|---------------|---------------|---------------------|-------------------|---------------|----------------|----------|--------------|-------------------------|---------------------|--------------------------|---------------------------------------------|
| Age                                         | 0.1  | -0.1 | -0.1        | -0.1    | -0.1 | -0.1          | -0.1   | -0.1   | -0.1    | -0.1   | -0.1    | -0.1            | -0.1          | -0.1          | -0.1                | -0.1              | -0.1          | -0.1           | -0.1     | -0.1         | -0.1                    | -0.1                | -0.1                     | -0.1                                        |
| BMI                                         | 0.1  | -0.1 | -0.1        | -0.1    | -0.1 | -0.1          | -0.1   | -0.1   | -0.1    | -0.1   | -0.1    | -0.1            | -0.1          | -0.1          | -0.1                | -0.1              | -0.1          | -0.1           | -0.1     | -0.1         | -0.1                    | -0.1                | -0.1                     | -0.1                                        |
| Energy kcal                                 | -0.1 | -0.1 | 0.52        | 0.83    | 0.57 | 0.54          | 0.48   | 0.39   | 0.2     | 0.1    | 0.1     | 0.1             | 0.1           | 0.1           | 0.1                 | 0.1               | 0.1           | 0.1            | 0.1      | 0.1          | 0.1                     | 0.1                 | 0.1                      | 0.1                                         |
| Protein                                     | -0.1 | -0.1 | 0.52        | 0.42    | 0.2  | 0.22          | 0.1    | 0.1    | 0.2     | 0.1    | 0.1     | 0.1             | 0.1           | 0.1           | 0.1                 | 0.1               | 0.1           | 0.1            | 0.1      | 0.1          | 0.1                     | 0.1                 | 0.1                      | 0.1                                         |
| Fat                                         | -0.1 | -0.1 | 0.83        | 0.42    | 0.1  | 0.29          | 0.26   | 0.2    | 0.1     | 0.1    | 0.1     | 0.1             | 0.1           | 0.1           | 0.1                 | 0.1               | 0.1           | 0.1            | 0.1      | 0.1          | 0.1                     | 0.1                 | 0.1                      | 0.1                                         |
| Carbohydrates                               | -0.1 | -0.1 | 0.57        | 0.1     | 0.1  | 0.56          | 0.55   | 0.52   | 0.61    | 0.1    | 0.1     | 0.1             | 0.1           | 0.1           | 0.1                 | 0.1               | 0.1           | 0.1            | 0.1      | 0.1          | 0.1                     | 0.1                 | 0.1                      | 0.1                                         |
| Fibers                                      | -0.1 | -0.1 | 0.54        | 0.22    | 0.29 | 0.56          | 0.37   | 0.2    | 0.1     | 0.1    | 0.1     | 0.1             | 0.1           | 0.1           | 0.1                 | 0.1               | 0.1           | 0.1            | 0.1      | 0.1          | 0.1                     | 0.1                 | 0.1                      | 0.1                                         |
| Sugars                                      | -0.1 | -0.1 | 0.48        | 0.1     | 0.26 | 0.55          | 0.37   | 0.73   | 0.1     | 0.1    | 0.1     | 0.1             | 0.1           | 0.1           | 0.1                 | 0.1               | 0.1           | 0.1            | 0.1      | 0.1          | 0.1                     | 0.1                 | 0.1                      | 0.1                                         |
| Sucrose                                     | -0.1 | -0.1 | 0.39        | 0.1     | 0.2  | 0.52          | 0.2    | 0.73   | 0.28    | 0.1    | 0.1     | 0.1             | 0.1           | 0.1           | 0.1                 | 0.1               | 0.1           | 0.1            | 0.1      | 0.1          | 0.1                     | 0.1                 | 0.1                      | 0.1                                         |
| Starch                                      | -0.1 | -0.1 | 0.2         | -0.2    | 0.1  | 0.61          | 0.1    | 0.1    | 0.28    | 0.1    | 0.1     | 0.1             | 0.1           | 0.1           | 0.1                 | 0.1               | 0.1           | 0.1            | 0.1      | 0.1          | 0.1                     | 0.1                 | 0.1                      | 0.1                                         |
| Alcohol                                     | -0.1 | -0.1 | 0.1         | 0.1     | -0.1 | -0.2          | -0.1   | 0.1    | -0.1    | -0.1   | -0.1    | -0.1            | -0.1          | -0.1          | -0.1                | -0.1              | -0.1          | -0.1           | -0.1     | -0.1         | -0.1                    | -0.1                | -0.1                     | -0.1                                        |
| Monosaccharides                             | -0.1 | -0.1 | 0.35        | 0.21    | 0.2  | 0.28          | 0.44   | 0.65   | 0.30    | 0.1    | 0.1     | 0.1             | 0.1           | 0.1           | 0.1                 | 0.1               | 0.1           | 0.1            | 0.1      | 0.1          | 0.1                     | 0.1                 | 0.1                      | 0.1                                         |
| Disaccharides                               | -0.1 | -0.1 | 0.46        | -0.2    | 0.22 | 0.59          | 0.32   | 0.74   | 0.83    | 0.35   | 0.1     | 0.1             | 0.1           | 0.1           | 0.1                 | 0.1               | 0.1           | 0.1            | 0.1      | 0.1          | 0.1                     | 0.1                 | 0.1                      | 0.1                                         |
| Saturated fat                               | -0.1 | -0.1 | 0.7         | 0.3     | 0.8  | 0             | -0.2   | 0.2    | 0.2     | 0.1    | 0.1     | 0.1             | 0.1           | 0.1           | 0.1                 | 0.1               | 0.1           | 0.1            | 0.1      | 0.1          | 0.1                     | 0.1                 | 0.1                      | 0.1                                         |
| Monounsaturated fat                         | -0.1 | -0.1 | 0.7         | 0.4     | 0.9  | 0             | 0.3    | 0.2    | 0.2     | -0.1   | -0.1    | 0.2             | 0.2           | 0.6           | 0.5                 | 0.1               | 0.1           | 0.1            | 0.1      | 0.1          | 0.1                     | 0.1                 | 0.1                      | 0.1                                         |
| Polysaturated fat                           | -0.1 | -0.1 | 0.6         | 0.5     | 0.6  | 0.1           | 0.5    | 0.1    | -0.1    | -0.1   | -0.1    | 0.3             | -0.2          | 0.5           | 0.1                 | 0.1               | 0.1           | 0.1            | 0.1      | 0.1          | 0.1                     | 0.1                 | 0.1                      | 0.1                                         |
| Total IBS-SSS                               | -0.1 | -0.1 | -0.2        | -0.1    | -0.2 | -0.1          | -0.2   | -0.1   | -0.2    | -0.1   | -0.1    | -0.2            | -0.1          | -0.2          | -0.1                | -0.2              | -0.1          | -0.2           | -0.1     | -0.2         | -0.1                    | -0.2                | -0.1                     | -0.2                                        |
| Abdominal pain                              | -0.1 | -0.1 | -0.2        | -0.1    | -0.1 | -0.1          | -0.2   | 0.2    | 0.1     | -0.1   | -0.1    | -0.2            | -0.1          | -0.2          | -0.1                | -0.2              | -0.1          | -0.2           | -0.1     | -0.2         | -0.1                    | -0.2                | -0.1                     | -0.2                                        |
| Diarrhea                                    | -0.1 | -0.1 | -0.2        | -0.1    | -0.1 | -0.2          | -0.1   | -0.1   | -0.1    | -0.1   | -0.1    | -0.2            | -0.1          | -0.2          | -0.1                | -0.2              | -0.1          | -0.2           | -0.1     | -0.2         | -0.1                    | -0.2                | -0.1                     | -0.2                                        |
| Constipation                                | -0.1 | -0.1 | -0.1        | -0.1    | -0.1 | -0.1          | -0.1   | -0.1   | -0.1    | -0.1   | -0.1    | -0.1            | -0.1          | -0.1          | -0.1                | -0.1              | -0.1          | -0.1           | -0.1     | -0.1         | -0.1                    | -0.1                | -0.1                     | -0.1                                        |
| Bloating and flatulence                     | -0.1 | -0.1 | -0.1        | -0.1    | -0.1 | -0.1          | -0.1   | -0.1   | -0.1    | -0.1   | -0.1    | -0.1            | -0.1          | -0.1          | -0.1                | -0.1              | -0.1          | -0.1           | -0.1     | -0.1         | -0.1                    | -0.1                | -0.1                     | -0.1                                        |
| Vomiting and nausea                         | -0.1 | -0.1 | -0.1        | -0.1    | -0.1 | -0.1          | -0.1   | -0.1   | -0.1    | -0.1   | -0.1    | -0.1            | -0.1          | -0.1          | -0.1                | -0.1              | -0.1          | -0.1           | -0.1     | -0.1         | -0.1                    | -0.1                | -0.1                     | -0.1                                        |
| Psychological well-being                    | -0.1 | -0.1 | -0.1        | -0.1    | -0.1 | -0.1          | -0.1   | -0.1   | -0.1    | -0.1   | -0.1    | -0.1            | -0.1          | -0.1          | -0.1                | -0.1              | -0.1          | -0.1           | -0.1     | -0.1         | -0.1                    | -0.1                | -0.1                     | -0.1                                        |
| Intestinal symptoms influence on daily life | -0.1 | -0.1 | -0.1        | -0.1    | -0.1 | -0.1          | -0.1   | -0.1   | -0.1    | -0.1   | -0.1    | -0.1            | -0.1          | -0.1          | -0.1                | -0.1              | -0.1          | -0.1           | -0.1     | -0.1         | -0.1                    | -0.1                | -0.1                     | -0.1                                        |

### C) Paired data

| Paired data                      |                                             |       |             |         |      |               |        |        |         |        |         |                 |               |               |                     |                   |               |                |          |              |                         |                     |                          |                         |      |
|----------------------------------|---------------------------------------------|-------|-------------|---------|------|---------------|--------|--------|---------|--------|---------|-----------------|---------------|---------------|---------------------|-------------------|---------------|----------------|----------|--------------|-------------------------|---------------------|--------------------------|-------------------------|------|
| Pearson Correlation ( <i>r</i> ) |                                             |       |             |         |      |               |        |        |         |        |         |                 |               |               |                     |                   |               |                |          |              |                         |                     |                          |                         |      |
|                                  | Age                                         | BMI   | Energy kcal | Protein | Fat  | Carbohydrates | Fibers | Sugars | Sucrose | Starch | Alcohol | Monosaccharides | Disaccharides | Saturated fat | Monounsaturated fat | Polysaturated fat | Total IBS-SSS | Abdominal pain | Diarrhea | Constipation | Bloating and flatulence | Vomiting and nausea | Psychological well-being | Intestinal symptoms ... |      |
| Food diaries (AIVO)              | Age                                         |       |             |         |      |               |        |        |         |        |         |                 |               |               |                     |                   |               |                |          |              |                         |                     |                          |                         |      |
|                                  | BMI                                         | -0    |             |         |      |               |        |        |         |        |         | -0.3            | 0.1           | -0            | -0.1                | -0.1              | 0.29          | 0.23           | 0.1      | 0.27         | 0.24                    | 0.23                | 0.1                      | 0.24                    |      |
|                                  | Energy kcal                                 | -0    | 0.50        |         |      |               |        |        |         |        | 0.2     | 0.2             | 0.47          | 0.6           | 0.7                 | 0.5               | 0.21          | 0.1            | 0.21     | 0.1          | 0.2                     | 0                   | 0                        | 0.21                    |      |
|                                  | Protein                                     | 0.1   | 0.50        | 0.34    |      |               |        |        |         |        | 0.1     | 0.2             | 0.2           | 0.3           | 0.2                 | 0.2               | 0             | 0              | 0.1      | 0.1          | 0.1                     | 0                   | 0                        | 0.23                    | -0.1 |
|                                  | Fat                                         | -0    | 0.77        | 0.34    | 0.1  |               |        |        |         |        | 0       | 0.2             | 0.8           | 0.9           | 0.5                 | 0.1               | 0             | 0              | 0        | 0            | 0                       | -0.1                | -0.1                     | 0.22                    | 0.22 |
|                                  | Carbohydrates                               | 0.1   | 0.57        | 0.1     | 0.1  | 0.36          |        |        |         |        | 0       | 0.2             | 0.56          | 0             | 0.1                 | 0.1               | 0.30          | 0.21           | 0.28     | 0.1          | 0.22                    | 0.1                 | 0.1                      | 0.22                    | 0.22 |
|                                  | Fibers                                      | -0.31 | 0.31        | 0.2     | 0.1  | 0.36          | 0.38   |        |         |        | 0.2     | 0.47            | 0.26          | 0.2           | 0.2                 | 0.2               | -0.1          | 0.2            | 0.1      | 0            | 0                       | 0                   | -0.1                     | -0                      | 0    |
|                                  | Sugars                                      | -0.39 | 0.1         | 0.1     | 0.57 | 0.38          | 0.58   | 0.2    |         |        | 0       | 0.52            | 0.67          | 0.1           | 0.1                 | 0.28              | 0.21          | 0.1            | 0.1      | 0            | 0                       | 0                   | 0                        | 0                       | 0    |
|                                  | Sucrose                                     | 0.1   | 0.42        | 0.1     | 0.41 | 0.2           | 0.58   | 0.23   | 0.1     |        | 0       | 0.70            | 0.2           | 0             | 0.2                 | 0.2               | 0.2           | 0.2            | 0.1      | 0.1          | 0                       | 0                   | 0                        | 0                       | 0.2  |
|                                  | Starch                                      | 0.23  | 0.2         | -0      | 0.59 | 0.2           | 0.2    | 0.23   | 0.1     | 0.1    | -0.1    | 0.40            | -0.2          | -0.2          | -0.1                | 0.2               | 0.1           | 0.27           | 0        | 0.25         | 0                       | 0.1                 | 0                        | 0                       | 0    |
|                                  | Alcohol                                     | 0.1   | 0.2         | 0.1     | 0.1  | -0            | -0     | 0.1    | 0.1     | 0.1    | 0.1     | 0.1             | 0.1           | 0.1           | 0.1                 | 0.1               | 0.1           | 0.1            | 0.1      | 0.1          | 0.1                     | 0.1                 | 0.1                      | 0.1                     | 0.1  |
|                                  | Monosaccharides                             | -0.3  | 0.1         | 0.2     | 0    | 0.47          | 0.52   | 0.1    | -0.1    | 0.1    | 0.1     | 0.22            | 0.1           | -0            | -0.1                | 0.2               | 0.1           | 0.36           | 0.2      | 0.38         | 0.25                    | 0.2                 | 0.1                      | 0.33                    | 0.33 |
|                                  | Disaccharides                               | 0.1   | 0.47        | 0.2     | 0.56 | 0.26          | 0.67   | 0.70   | 0.42    | 0.1    | 0.22    | 0.2             | 0.1           | 0             | 0                   | 0                 | 0             | 0.36           | 0.2      | 0.38         | 0.25                    | 0.2                 | 0.1                      | 0.33                    | 0.33 |
|                                  | Saturated fat                               | -0    | 0.6         | 0.3     | 0.8  | 0             | 0      | 0      | 0       | 0      | 0.1     | 0.2             | 0.2           | 0.1           | 0.5                 | 0.1               | 0.2           | 0              | 0        | 0            | -0.1                    | -0.1                | -0.1                     | -0.1                    | -0.1 |
|                                  | Monounsaturated fat                         | -0.1  | 0.7         | 0.2     | 0.9  | 0.1           | 0.2    | 0.1    | 0.2     | -0.2   | 0.1     | 0               | 0.1           | 0.5           | 0.6                 | 0.6               | 0             | 0              | 0.1      | 0            | 0                       | -0.1                | -0.1                     | -0.1                    | -0.2 |
| Polysaturated fat                | -0.1                                        | 0.5   | 0.2         | 0.5     | 0.1  | 0.2           | 0      | -0.1   | 0.1     | -0     | -0      | 0.1             | 0.6           | -0.1          | -0.1                | -0.1              | -0.1          | -0.1           | -0.1     | -0.1         | -0.1                    | -0.1                | -0.1                     | -0.1                    |      |
| Questionnaire (VAS-IBS)          | Total IBS-SSS                               | 0.29  | 0.21        | 0.1     | 0.30 | -0.1          | 0.28   | 0.2    | 0.2     | 0.1    | 0.36    | 0.2             | 0             | -0.1          | 0                   | 0                 | 0.74          | 0.38           | 0.35     | 0.63         | 0.32                    | 0                   | 0.71                     | 0.57                    |      |
|                                  | Abdominal pain                              | 0.23  | 0.1         | -0      | 0.21 | 0             | 0.21   | 0.1    | -0.1    | -0.1   | 0.2     | 0.2             | 0             | -0.1          | 0                   | 0                 | 0.74          | 0.38           | 0.35     | 0.63         | 0.32                    | 0                   | 0.71                     | 0.57                    |      |
|                                  | Diarrhea                                    | 0.1   | 0.21        | 0.1     | 0.28 | 0.2           | 0.27   | 0.1    | 0.38    | 0.1    | 0.38    | 0.1             | 0             | -0.1          | 0.38                | 0.24              | 0.33          | 0.47           | 0.31     | 0.36         | 0.2                     | 0.31                | 0.35                     | 0.31                    |      |
|                                  | Constipation                                | 0.27  | 0.1         | 0.1     | 0.1  | 0.1           | 0.1    | 0.1    | -0.1    | -0.2   | -0      | -0              | -0            | -0            | 0.35                | 0.33              | 0.1           | 0.36           | 0.2      | 0.2          | 0.2                     | 0.1                 | 0.35                     | 0.35                    |      |
|                                  | Bloating and flatulence                     | 0.24  | 0.2         | 0.1     | 0.22 | 0             | 0.1    | 0.25   | 0.1     | 0.25   | 0.1     | 0.25            | 0.1           | 0.1           | 0.63                | 0.47              | 0.36          | 0.2            | 0.1      | 0.1          | 0.1                     | 0.1                 | 0.52                     | 0.52                    |      |
|                                  | Vomiting and nausea                         | 0.23  | 0           | 0       | -0.1 | 0.1           | 0      | 0.1    | 0       | -0.1   | -0.2    | -0.1            | -0.1          | -0.1          | 0.32                | 0.31              | 0.2           | 0.2            | 0.1      | 0.1          | 0.1                     | 0.1                 | 0.52                     | 0.52                    |      |
|                                  | Psychological well-being                    | 0.1   | 0           | 0.23    | 0.1  | 0.1           | 0      | 0      | 0.1     | 0.1    | 0       | 0.1             | -0.1          | -0.1          | 0                   | 0                 | 0             | 0.1            | 0.1      | 0.1          | 0.1                     | 0.1                 | 0.1                      | 0.1                     |      |
|                                  | Intestinal symptoms influence on daily life | 0.24  | 0.21        | -0.1    | 0.22 | 0.22          | -0     | 0.2    | 0.2     | 0.1    | -0      | 0.33            | 0.2           | 0.2           | 0                   | 0.71              | 0.57          | 0.31           | 0.2      | 0.52         | 0.35                    | 0.1                 | 0.52                     | 0.52                    |      |

baseline data, B) 4-week data, and C) paired data. Significance level  $\alpha = .05$ . Significant correlations are denoted by bold text and borders. Blue-red colors according to the Pearson correlation coefficient ( $r$ ), blue color denotes negative correlations and red color denotes positive correlations.

**Supplementary Table 1.** Metabolomics modeling against food diaries, questionnaire, and clinical data. Orthogonal partial least squares (OPLS) (1+1) models regressing the metabolomics data (n=91, k=322) against each one of the food diaries (AIVO), questionnaires (IBS-SSS, VAS-IBS), and clinical data (age, BMI) descriptors (n=91, k=24). The paired data was calculated as the relative individual change between the baseline data and the 4-week data. The CV-ANOVA p-values refer to OPLS model statistics. Significance levels  $\alpha = .05$  (\*),  $\alpha = .01$  (\*\*),  $\alpha = .001$  (\*\*\*) was used. The OPLS p1-loadings were reported for the metabolic feature with maximum corresponding predictive VIP value. In addition, the maximum absolute correlation (Pearson, r) was reported.

| OPLS (1+1) Model                        | (X=322 metabolic features, N=91) | R2X(cum) | R2Y(cum) | Q2(cum) | p (CV-ANOVA) | Max. VIP (pred.) Metabolite | p-loadings                  | Max. Correlation Metabolite | Pearson ( r )             |        |
|-----------------------------------------|----------------------------------|----------|----------|---------|--------------|-----------------------------|-----------------------------|-----------------------------|---------------------------|--------|
| Baseline data - Age                     |                                  | 0.233    | 0.685    | 0.454   | 1.01E-10     | ( *** )                     | Inositol, Myo-              | 0.123                       | L-Palmitoylcarnitine      | 0.564  |
| Baseline data - BMI                     |                                  | 0.219    | 0.609    | 0.209   | 2.71E-05     | ( *** )                     | LysoPC(19:0/0:0)            | -0.175                      | Uric acid                 | 0.496  |
| Baseline data - Energy kcal             |                                  | 0.213    | 0.547    | -0.11   | 1            | ns.                         | Cholic acid                 | 0.181                       | Deoxycholic acid          | 0.402  |
| Baseline data - Protein                 |                                  | 0.22     | 0.488    | -0.189  | 1            | ns.                         | Valine                      | 0.175                       | Tiglylcarnitine           | 0.363  |
| Baseline data - Fat                     |                                  | 0.207    | 0.522    | -0.203  | 1            | ns.                         | Deoxycholic acid            | 0.227                       | Deoxycholic acid          | 0.479  |
| Baseline data - Carbohydrates           |                                  | 0.215    | 0.523    | -0.133  | 1            | ns.                         | LysoPC(12:0/0:0)            | 0.166                       | Dodecanoic acid           | 0.322  |
| Baseline data - Fibers                  |                                  | 0.192    | 0.539    | 0.0385  | 0.492        | ns.                         | 2,4-Dihydroxybenzoic acid   | 0.228                       | Dodecanedioic acid        | 0.399  |
| Baseline data - Sugars                  |                                  | 0.226    | 0.415    | -0.104  | 1            | ns.                         | Palmitoleic acid            | 0.204                       | Palmitoleic acid          | 0.314  |
| Baseline data - Sucrose                 |                                  | 0.219    | 0.413    | -0.358  | 1            | ns.                         | Myristic acid               | 0.204                       | Phenylalanylglutamic acid | 0.290  |
| Baseline data - Starch                  |                                  | 0.227    | 0.447    | -0.239  | 1            | ns.                         | Octadecenoic acid,-9-(z)-   | -0.176                      | LysoPC(0:0/15:0)          | 0.328  |
| Baseline data - Alcohol                 |                                  | 0.207    | 0.466    | 0.0356  | 0.406        | ns.                         | Inositol, Scyllo-           | 0.192                       | 3-indolepropionic acid    | 0.472  |
| Baseline data - Monosaccharides         |                                  | 0.218    | 0.465    | -0.0571 | 1            | ns.                         | LysoPC(0:0/19:0)            | 0.165                       | Tetradecanedioic acid     | 0.303  |
| Baseline data - Disaccharides           |                                  | 0.215    | 0.463    | -0.356  | 1            | ns.                         | Myristic acid               | 0.218                       | Deoxycholic acid          | 0.273  |
| Baseline data - Saturated fat           |                                  | 0.212    | 0.576    | -0.0981 | 1            | ns.                         | Cholic acid                 | 0.250                       | Deoxycholic acid          | 0.577  |
| Baseline data - Monounsaturated fat     |                                  | 0.103    | 0.536    | -0.25   | 1            | ns.                         | Deoxycholic acid            | 0.220                       | Deoxycholic acid          | 0.338  |
| Baseline data - Polyunsaturated fat     |                                  | 0.217    | 0.425    | -0.404  | 1            | ns.                         | Xanthine                    | 0.182                       | Xanthine                  | 0.301  |
| Baseline data - Total IBS-SSS           |                                  | 0.134    | 0.65     | -0.0797 | 1            | ns.                         | Citric acid                 | -0.236                      | Citric acid               | -0.405 |
| Baseline data - Abdominal pain          |                                  | 0.202    | 0.519    | -0.203  | 1            | ns.                         | Phenylalanine               | -0.176                      | Homocitrulline            | -0.339 |
| Baseline data - Diarrhea                |                                  | 0.106    | 0.571    | -0.0444 | 1            | ns.                         | Citric acid                 | -0.223                      | Citric acid               | -0.377 |
| Baseline data - Constipation            |                                  | 0.219    | 0.478    | 0.114   | 0.0320       | ( * )                       | 2-Hydroxymyristoylcarnitine | -0.176                      | Propionylcarnitine        | -0.380 |
| Baseline data - Bloating and flatulence |                                  | 0.227    | 0.362    | -0.227  | 1            | ns.                         | LysoPC(20:2(11Z,14Z)/0:0)   | 0.159                       | Docosatetraenoylcarnitine | -0.292 |
| Baseline data - Vomiting and nausea     |                                  | 0.214    | 0.489    | -0.351  | 1            | ns.                         | Adenosine                   | 0.187                       | Tartaric acid             | 0.323  |

|                                                             |       |       |        |   |     |                      |       |          |        |
|-------------------------------------------------------------|-------|-------|--------|---|-----|----------------------|-------|----------|--------|
| Baseline data - Psychological well-being                    | 0.224 | 0.437 | -0.155 | 1 | ns. | Cytidine             | 0.159 | Cytidine | 0.339  |
| Baseline data - Intestinal symptoms influence on daily life | 0.191 | 0.441 | -0.258 | 1 | ns. | LysoPC(18:1(9Z)/0:0) | 0.200 | Tyrosine | -0.293 |

| OPLS (1+1) Model                        | (X=322 metabolic features, N=91) | R2X(cum) | R2Y(cum) | Q2(cum) | p (CV-ANOVA)     | Max. VIP (pred.) Metabolite                  | p-loadings | Max. Correlation Metabolite | Pearson ( r ) |
|-----------------------------------------|----------------------------------|----------|----------|---------|------------------|----------------------------------------------|------------|-----------------------------|---------------|
| 4-weeks data - Age                      |                                  | 0.228    | 0.665    | 0.412   | 2.19E-09 ( *** ) | gamma-Glutamyltyrosine                       | 0.133      | Ornithine                   | 0.571         |
| 4-weeks data - BMI                      |                                  | 0.167    | 0.705    | 0.323   | 7.58E-07 ( *** ) | L-Glutamic acid                              | 0.199      | Glucose                     | 0.495         |
| 4-weeks data - Energy kcal              |                                  | 0.229    | 0.365    | -0.251  | 1 ns.            | Oleoylcarnitine                              | -0.217     | Octadecenoic acid,-9-(z)-   | -0.275        |
| 4-weeks data - Protein                  |                                  | 0.213    | 0.443    | -0.015  | 1 ns.            | Valine                                       | 0.225      | Valine                      | 0.334         |
| 4-weeks data - Fat                      |                                  | 0.21     | 0.506    | -0.217  | 1 ns.            | 12-Hydroxystearic acid                       | 0.189      | 12-Hydroxystearic acid      | 0.330         |
| 4-weeks data - Carbohydrates            |                                  | 0.15     | 0.447    | -0.0405 | 1 ns.            | LysoPC(0:0/14:0)                             | 0.147      | 3-Hydroxybutyric acid       | -0.380        |
| 4-weeks data - Fibers                   |                                  | 0.175    | 0.463    | -0.0374 | 1 ns.            | 2,4-Dihydroxybenzoic acid                    | 0.199      | 2,4-Dihydroxybenzoic acid   | 0.359         |
| 4-weeks data - Sugars                   |                                  | 0.212    | 0.393    | -0.374  | 1 ns.            | Valine                                       | -0.171     | L-threonic acid             | 0.267         |
| 4-weeks data - Sucrose                  |                                  | 0.139    | 0.424    | -0.236  | 1 ns.            | Valine                                       | -0.214     | L-threonic acid             | 0.318         |
| 4-weeks data - Starch                   |                                  | 0.166    | 0.575    | 0.149   | 0.00726 ( ** )   | 3-Hydroxydodecanoic acid                     | -0.144     | 4-Guanidinobutanoic acid    | 0.403         |
| 4-weeks data - Alcohol                  |                                  | 0.206    | 0.457    | -0.258  | 1 ns.            | Palmitoleic acid                             | -0.213     | Malic acid                  | 0.314         |
| 4-weeks data - Monosaccharides          |                                  | 0.225    | 0.417    | -0.414  | 1 ns.            | Xanthine                                     | 0.224      | Xanthine                    | 0.422         |
| 4-weeks data - Disaccharides            |                                  | 0.142    | 0.412    | -0.253  | 1 ns.            | Cervonylcarnitine                            | -0.161     | 2-Hydroxymyristoylcarnitine | -0.276        |
| 4-weeks data - Saturated fat            |                                  | 0.215    | 0.572    | -0.312  | 1 ns.            | 2-amino-adipic acid                          | 0.179      | Isoleucyl-Leucine           | 0.394         |
| 4-weeks data - Monounsaturated fat      |                                  | 0.212    | 0.484    | -0.15   | 1 ns.            | LysoPE(O-16:0/0:0)                           | 0.201      | LysoPE(P-16:0/0:0)          | 0.360         |
| 4-weeks data - Polyunsaturated fat      |                                  | 0.216    | 0.504    | 0.106   | 0.0468462 ( * )  | LysoPE(O-16:0/0:0)                           | 0.205      | LysoPE(O-16:0/0:0)          | 0.378         |
| 4-weeks data - Total IBS-SSS            |                                  | 0.21     | 0.466    | -0.0215 | 1 ns.            | LysoPC(20:0/0:0)                             | 0.181      | Propionylcarnitine          | -0.302        |
| 4-weeks data - Abdominal pain           |                                  | 0.216    | 0.453    | -0.0831 | 1 ns.            | Propionylcarnitine                           | -0.177     | Adipic acid                 | -0.309        |
| 4-weeks data - Diarrhea                 |                                  | 0.21     | 0.466    | -0.192  | 1 ns.            | Myristoleic acid                             | 0.201      | Abietic acid                | 0.273         |
| 4-weeks data - Constipation             |                                  | 0.191    | 0.467    | 0.0945  | 0.071 ns.        | 2-Hydroxymyristoylcarnitine                  | -0.179     | 2-Hydroxy-lauroylcarnitine  | -0.412        |
| 4-weeks data - Bloating and flatulence  |                                  | 0.141    | 0.525    | 0.0765  | 0.140 ns.        | 3-Hydroxyisovaleric acid                     | -0.172     | Eicosanedioic acid          | 0.397         |
| 4-weeks data - Vomiting and nausea      |                                  | 0.216    | 0.516    | -0.0514 | 1 ns.            | Eicosatetraenoic acid, 5,8,11,14-(z,z,z,z,-) | -0.192     | Sulfolithocholyglycine      | -0.328        |
| 4-weeks data - Psychological well-being |                                  | 0.208    | 0.473    | -0.161  | 1 ns.            | 2-Hydroxy-lauroylcarnitine                   | -0.231     | 2-Hydroxy-lauroylcarnitine  | -0.273        |

| 4-weeks data - Intestinal symptoms influence on daily life | 0.143                            | 0.525        | 0.0304       | 0.478       | ns.                      | LysoPC(20:0/0:0)             | 0.173                               | 2-Hydroxy-lauroylcarnitine         | -0.358        |
|------------------------------------------------------------|----------------------------------|--------------|--------------|-------------|--------------------------|------------------------------|-------------------------------------|------------------------------------|---------------|
| OPLS (1+1) Model                                           | (X=322 metabolic features, N=91) | R2X(cum)     | R2Y(cum)     | Q2(cum)     | p (CV-ANOVA)             | Max. VIP (pred.) Metabolite  | p-loadings                          | Max. Correlation Metabolite        | Pearson ( r ) |
| <b>Paired data - BMI</b>                                   |                                  | <b>0.195</b> | <b>0.623</b> | <b>0.15</b> | <b>0.00749073 ( ** )</b> | <b>3-Hydroxybutyric acid</b> | <b>-0.147</b>                       | <b>Cholic acid</b>                 | <b>0.652</b>  |
| Paired data - Energy kcal                                  |                                  | 0.172        | 0.571        | -0.488      | 1                        | ns.                          | Progesterone                        | Glyceric acid                      | 0.352         |
| Paired data - Protein                                      |                                  | 0.108        | 0.588        | -0.154      | 1                        | ns.                          | Sebacic acid                        | Glycoursodeoxycholic acid          | 0.325         |
| Paired data - Fat                                          |                                  | 0.177        | 0.514        | -0.376      | 1                        | ns.                          | LysoPC(20:5(5Z,8Z,11Z,14Z,17Z)/0:0) | LysoPC(20:0/0:0)                   | 0.305         |
| Paired data - Carbohydrates                                |                                  | 0.186        | 0.541        | -0.0833     | 1                        | ns.                          | 2-amino-adipic acid                 | Niacinamide                        | 0.401         |
| Paired data - Fibers                                       |                                  | 0.149        | 0.517        | -0.164      | 1                        | ns.                          | gamma-Glutamyltryptophan            | Pimelic acid                       | 0.329         |
| Paired data - Sugars                                       |                                  | 0.175        | 0.563        | -0.584      | 1                        | ns.                          | Xanthine                            | Glucose                            | 0.275         |
| Paired data - Sucrose                                      |                                  | 0.179        | 0.592        | -0.269      | 1                        | ns.                          | Methylmalonylcarnitine              | Ribitol                            | 0.391         |
| Paired data - Starch                                       |                                  | 0.207        | 0.489        | -0.0235     | 1                        | ns.                          | Valine                              | LysoPC(0:0/20:3)                   | 0.431         |
| Paired data - Alcohol                                      |                                  | 0.176        | 0.566        | -0.202      | 1                        | ns.                          | Taurodeoxycholic acid               | Lithocholic acid glycine conjugate | -0.376        |
| Paired data - Monosaccharides                              |                                  | 0.186        | 0.621        | -0.00088    | 1                        | ns.                          | Butyrylcarnitine                    | 4-Pyridoxic acid                   | 0.582         |
| Paired data - Disaccharides                                |                                  | 0.177        | 0.59         | -0.244      | 1                        | ns.                          | Progesterone                        | 4-Hydroxybenzoic acid              | 0.285         |
| Paired data - Saturated fat                                |                                  | 0.172        | 0.519        | -0.478      | 1                        | ns.                          | 2-Hydroxycaproic acid               | Isoleucyl-Leucine                  | 0.284         |
| Paired data - Monounsaturated fat                          |                                  | 0.178        | 0.561        | -0.327      | 1                        | ns.                          | LysoPC(20:0/0:0)                    | LysoPC(20:0/0:0)                   | 0.375         |
| Paired data - Polyunsaturated fat                          |                                  | 0.096        | 0.626        | -0.0851     | 1                        | ns.                          | LysoPE(20:4(5Z,8Z,11Z,14Z)/0:0)     | LysoPE(20:4(5Z,8Z,11Z,14Z)/0:0)    | -0.313        |
| Paired data - Total IBS-SSS                                |                                  | 0.143        | 0.568        | 0.0564      | 0.293                    | ns.                          | Progesterone                        | Sinigrin                           | 0.401         |
| Paired data - Abdominal pain                               |                                  | 0.144        | 0.524        | -0.127      | 1                        | ns.                          | Progesterone                        | Sinigrin                           | 0.459         |
| Paired data - Diarrhea                                     |                                  | 0.139        | 0.59         | -0.118      | 1                        | ns.                          | 4-Hydroxybenzoic acid               | 4-Hydroxybenzoic acid              | 0.510         |
| Paired data - Constipation                                 |                                  | 0.202        | 0.438        | -0.0369     | 1                        | ns.                          | Valine                              | Urea                               | -0.351        |
| Paired data - Bloating and flatulence                      |                                  | 0.145        | 0.564        | 0.00921     | 0.938                    | ns.                          | delta-Hexanolactone                 | delta-Hexanolactone                | -0.370        |
| Paired data - Vomiting and nausea                          |                                  | 0.185        | 0.393        | -0.432      | 1                        | ns.                          | Propionylcarnitine                  | beta-Alanine                       | 0.333         |
| Paired data - Psychological well-being                     |                                  | 0.154        | 0.617        | -0.103      | 1                        | ns.                          | Ibuprofen                           | Ibuprofen                          | 0.741         |
| Paired data - Intestinal symptoms influence on daily life  |                                  | 0.185        | 0.618        | 0.0658      | 0.207                    | ns.                          | delta-Hexanolactone                 | Sinigrin                           | 0.487         |

**Supplementary Table 2.** Statistically significant metabolic features linking the Metaboanalyst pathway enrichment and Small Molecule Pathway Database (SMPDB) output with the Human Metabolome Database (HMDB) descriptions [26,27,39]. In total, 105 unique metabolic features were found significantly different between the intervention group and the control group, for the 4-week data and/or the paired data.

| Annotated Metabolic features    | Analysis            | HMDB ID         | KEGG ID | Baseline (T0) | Four weeks (T1) | Paired (1+(T1-T0)/T0) | MetaboAnalyst SMPDB pathway association              | Pathway      | HMDB description nutrient             | HMDB description food sources |
|---------------------------------|---------------------|-----------------|---------|---------------|-----------------|-----------------------|------------------------------------------------------|--------------|---------------------------------------|-------------------------------|
| Dodecanoylcarnitine             | LCMS (+)            | HMDB000225<br>0 |         | *             | ***             | ***                   |                                                      |              |                                       |                               |
| Linoleic acid                   | LCMS (-),<br>GCMS   | HMDB000067<br>3 | C01595  | ns            | ***             | ***                   | Alpha Linolenic Acid and<br>Linoleic Acid Metabolism | SMP0001<br>8 | omega-6 fatty acid, PUFA<br>essential | plant glyco-<br>sides         |
| Docosapentaenoic acid (22n-3)   | LCMS (-)            | HMDB000652<br>8 | C16513  | ns            | ***             | ***                   | Alpha Linolenic Acid and<br>Linoleic Acid Metabolism | SMP0001<br>8 | omega-3 fatty acid<br>essential       | fish oils                     |
| Docosahexaenoic acid            | GCMS, LCMS (-)<br>) | HMDB000218<br>3 | C06429  | ns            | ***             | ***                   | Alpha Linolenic Acid and<br>Linoleic Acid Metabolism | SMP0001<br>8 | omega-3 fatty acid                    | fish oils                     |
| Palmitic acid                   | LCMS (-),<br>GCMS   | HMDB000022<br>0 | C00249  | ns            | ***             | ***                   | Fatty Acid Biosynthesis                              | SMP0045<br>6 | saturated fatty acid                  | palm fruit                    |
| 3-Hydroxybutyric acid           | LCMS (-),<br>GCMS   | HMDB000001<br>1 | C01089  | ns            | ***             | ***                   | Fatty Acid Biosynthesis                              | SMP0045<br>6 | ketone body                           |                               |
| (R)-3-Hydroxy-hexadecanoic acid | LCMS (-)            | HMDB001073<br>4 |         | ns            | ***             | ***                   | Fatty Acid Biosynthesis                              | SMP0045<br>6 | saturated fatty acid                  |                               |
| trans-2-Dodecenoylcarnitine     | LCMS (+)            | HMDB001332<br>6 |         | ns            | ***             | ***                   |                                                      |              |                                       | cow milk<br>macadamia         |
| Palmitoleic acid                | GCMS, LCMS (-)<br>) | HMDB000322<br>9 | C08362  | ns            | ***             | ***                   |                                                      |              | monounsaturated fatty acid            | oil, sea buck-<br>thorn oil   |

|                             |          |   |        |    |     |     |                            |                                   |
|-----------------------------|----------|---|--------|----|-----|-----|----------------------------|-----------------------------------|
| Oleic acid                  | LCMS (-) | 7 | C00712 | ns | *** | *** | monounsaturated fatty acid | olive oil, almond oil             |
| Myristoleoylcarnitine       | LCMS (+) | 8 |        | ns | *** | *** |                            |                                   |
| Myristoleic acid            | LCMS (-) | 0 | C08322 | ns | *** | *** | monounsaturated fatty acid | cow milk, sunflowers, dates       |
| Octadecenoic acid,-9-(z)-   | GCMS     | 3 | C01712 | ns | *** | *** | monounsaturated fatty acid | hydrogenated vegetable oils, milk |
| Eicoseneoylcarnitine        | LCMS (+) |   |        | ns | *** | *** |                            |                                   |
| alpha-Dimorphecolic acid    | LCMS (-) | 0 | C14767 | ns | *** | *** | endogenous fatty acid      |                                   |
| 3-Hydroxydodecanoic acid    | LCMS (-) | 7 |        | ns | *** | *** | saturated fatty acid       |                                   |
| 3-Hydroxycapric acid        | LCMS (-) | 3 |        | ns | *** | *** | saturated fatty acid       |                                   |
| 3, 5-Tetradecadiencarnitine | LCMS (+) | 1 |        | ns | *** | *** |                            |                                   |
| 2-Hydroxymyristoylcarnitine | LCMS (+) | 6 |        | ns | *** | *** |                            |                                   |
| 2-Hydroxymyristic acid      | LCMS (-) | 1 |        | ns | *** | *** |                            |                                   |
| 2-Hydroxylauroylcarnitine   | LCMS (+) | 4 |        | ns | *** | *** |                            |                                   |
| Aconitic acid, cis-         | GCMS     | 2 | C00417 | ns | **  | *** |                            |                                   |

SMP0005

7

Citric Acid Cycle

|                               |                            |            |        |    |    |     |                                                            |         |                                                                            |
|-------------------------------|----------------------------|------------|--------|----|----|-----|------------------------------------------------------------|---------|----------------------------------------------------------------------------|
| Hexose                        | GCMS                       | HMDB000012 |        |    |    |     | Transfer of Acetyl Groups                                  | SMP0046 |                                                                            |
|                               |                            | 2          | C00221 | ns | ** | *** | into Mitochondria                                          | 6       |                                                                            |
| Oleoylcarnitine               | LCMS (+)<br>GCMS, LCMS (-) | HMDB000506 |        |    |    |     |                                                            |         |                                                                            |
|                               |                            | 5          |        | ns | ** | *** |                                                            |         |                                                                            |
| Citric acid                   |                            | HMDB000009 |        |    |    |     | Transfer of Acetyl Groups                                  | SMP0046 | citrus fruits                                                              |
|                               |                            | 4          | C00158 | ns | ** | *** | into Mitochondria                                          | 6       |                                                                            |
| 2-amino-adipic acid           | GCMS                       | HMDB000051 |        |    |    |     |                                                            |         |                                                                            |
|                               |                            | 0          | C00956 | ns | ** | *** |                                                            |         |                                                                            |
| L-Acetylcarnitine             | LCMS (+)                   | HMDB000020 |        |    |    |     | Beta Oxidation of Very                                     | SMP0005 |                                                                            |
|                               |                            | 1          | C02571 | ns | *  | *** | Long Chain Fatty Acids                                     | 2       |                                                                            |
| Urea                          | GCMS                       | HMDB000029 |        |    |    |     |                                                            | SMP0005 |                                                                            |
|                               |                            | 4          | C00086 | ns | *  | *** | Urea Cycle                                                 | 9       |                                                                            |
| Decanoylcarnitine             | LCMS (+)                   | HMDB000065 |        |    |    |     |                                                            |         |                                                                            |
|                               |                            | 1          |        | ns | *  | *** |                                                            |         |                                                                            |
| 9-Hexadecenoylcarnitine       | LCMS (+)                   | HMDB001320 |        |    |    |     |                                                            |         |                                                                            |
|                               |                            | 7          |        | ns | *  | *** |                                                            |         |                                                                            |
| 9,12-Hexadecadienoylcarnitine | LCMS (+)                   | HMDB001333 |        |    |    |     |                                                            |         |                                                                            |
|                               |                            | 4          |        | ns | *  | *** |                                                            |         |                                                                            |
| 1,5-anhydro-d-glucitol        | GCMS                       | HMDB000271 |        |    |    |     |                                                            |         | derived<br>mainly from<br>food<br>animal and<br>vegetable<br>fats and oils |
|                               |                            | 2          | C07326 | ns | *  | *** |                                                            |         |                                                                            |
| Octadecanoic acid             | GCMS                       | HMDB000082 |        |    |    |     | Mitochondrial Beta-Oxidation of Long Chain Saturated FA's  | SMP0048 | saturated fatty acid                                                       |
|                               |                            | 7          | C01530 | ns | *  | *** |                                                            | 2       |                                                                            |
| L-Octanoylcarnitine           | LCMS (+)                   | HMDB000079 |        |    |    |     | Mitochondrial Beta-Oxidation of Short Chain Saturated FA's | SMP0048 |                                                                            |
|                               |                            | 1          | C02838 | ns | ns | *** |                                                            | 2       |                                                                            |



|                               |           |            |        |    |    |     |                        |         |                              |
|-------------------------------|-----------|------------|--------|----|----|-----|------------------------|---------|------------------------------|
|                               |           | HMDB000236 |        |    |    |     |                        |         |                              |
| Tiglylcarnitine               | LCMS (+)  | 6          |        | ns | ns | *** |                        |         |                              |
|                               |           | HMDB000067 |        |    |    |     |                        |         | saturated fatty acid         |
| Hexadecanedioic acid          | LCMS (-)  | 2          | C19615 | ns | ns | *** |                        |         | acid                         |
|                               |           | HMDB001037 |        |    |    |     |                        |         | omega-9 fatty acid, PUFA     |
| 5,8,11-Eicosatrienoic acid    | LCMS (-)  | 8          |        | ns | ns | *** |                        |         |                              |
|                               |           | HMDB000055 |        |    |    |     |                        |         |                              |
| 3-Methylglutaryl carnitine    | LCMS (+)  | 2          |        | ns | ns | *** |                        |         |                              |
|                               |           | HMDB002914 |        |    |    |     |                        |         |                              |
| N-gamma-Glutamylglutamine     | LCMS (+)  | 7          |        | ns | ns | *** |                        |         |                              |
|                               |           |            |        |    |    |     |                        |         | coconut oil, palm kernel oil |
|                               | LCMS (-), | HMDB000063 |        |    |    |     | Beta Oxidation of Very | SMP0005 | saturated fatty acid         |
| Dodecanoic acid               | GCMS      | 8          | C02679 | ns | ns | *** | Long Chain Fatty Acids | 2       | acid                         |
|                               |           | HMDB000079 |        |    |    |     |                        |         | saturated fatty acid         |
| Sebacic acid                  | LCMS (-)  | 2          | C08277 | ns | ns | *** |                        |         | acid                         |
|                               |           | HMDB000085 |        |    |    |     |                        |         | saturated fatty acid         |
| Pimelic acid                  | LCMS (-)  | 7          | C02656 | ns | ns | *** |                        |         | acid                         |
|                               |           | HMDB000068 |        |    |    |     |                        |         |                              |
| Isovaleryl carnitine          | LCMS (+)  | 8          |        | ns | ns | *** |                        |         |                              |
|                               |           | HMDB000073 |        |    |    |     |                        |         |                              |
| Isobutyryl-L-carnitine        | LCMS (+)  | 6          |        | ns | ns | *** |                        |         |                              |
|                               |           | HMDB000062 |        |    |    |     |                        |         | saturated fatty acid         |
| Dodecanedioic acid            | LCMS (-)  | 3          | C02678 | ns | ns | *** |                        |         | acid                         |
|                               |           | HMDB000045 |        |    |    |     |                        |         |                              |
| delta-Hexanolactone           | LCMS (-)  | 3          |        | ns | ns | *** |                        |         |                              |
|                               |           | HMDB006118 |        |    |    |     |                        |         |                              |
| 3-Hydroxyisovaleryl carnitine | LCMS (+)  | 9          |        | ns | ns | *** |                        |         |                              |

|                              |           |            |        |    |     |    |                           |                            |
|------------------------------|-----------|------------|--------|----|-----|----|---------------------------|----------------------------|
|                              |           | HMDB000183 |        |    |     |    |                           |                            |
| Progesterone                 | LCMS (+)  | 0          | C00410 | *  | *** | ** |                           | steroid hormone            |
|                              |           | HMDB001039 |        |    |     |    |                           |                            |
| LysoPC(20:3(8Z,11Z,14Z)/0:0) | LCMS (+)  | 4          | C04230 | ns | *** | ** |                           |                            |
|                              |           |            |        |    |     |    | Glycerophospholipid me-   | SMP0003                    |
| LysoPC(0:0/20:3)             | LCMS (+)  |            | C04230 | ns | *** | ** | tabolism                  | 9                          |
|                              |           | HMDB001312 |        |    |     |    |                           |                            |
| Valerylcarnitine             | LCMS (+)  | 8          |        | ns | **  | ** |                           | cow milk                   |
|                              |           | HMDB000071 |        |    |     |    |                           |                            |
| Hydroxyoctanoic acid         | LCMS (-)  | 1          |        | ns | **  | ** |                           |                            |
|                              |           |            |        |    |     |    | Mitochondrial Beta-Oxida- |                            |
|                              |           | HMDB000084 |        |    |     |    | tion of Long Chain Satu-  | SMP0048                    |
| Stearoylcarnitine            | LCMS (+)  | 8          |        | ns | **  | ** | rated FA's                | 2                          |
|                              |           |            |        |    |     |    |                           |                            |
|                              | LCMS (-), | HMDB000104 |        |    |     |    | Alpha Linolenic Acid and  | SMP0001                    |
| Arachidonic acid             | GCMS      | 3          | C00219 | ns | **  | ** | Linoleic Acid Metabolism  | 8                          |
|                              |           |            |        |    |     |    |                           | essential fatty acid, PUFA |
|                              |           |            |        |    |     |    |                           |                            |
|                              |           | HMDB006170 |        |    |     |    |                           | edible vege-               |
| 12-Hydroxystearic acid       | LCMS (-)  | 6          |        | ns | *   | ** |                           | table oils                 |
|                              |           |            |        |    |     |    |                           | (canola oil,               |
|                              |           | HMDB000624 |        |    |     |    |                           | castor oil)                |
| gamma-Glutamylalanine        | LCMS (+)  | 8          | C03740 | ns | *   | ** | Glutathione Metabolism    | SMP0001                    |
|                              |           |            |        |    |     |    |                           | 5                          |
|                              |           | HMDB000008 |        |    |     |    |                           | SMP0004                    |
| Cytidine                     | LCMS (-)  | 9          | C00475 | ns | *   | ** | Pyrimidine Metabolism     | 6                          |
|                              |           |            |        |    |     |    |                           |                            |
|                              |           | HMDB000506 |        |    |     |    |                           |                            |
| Tetradecanoylcarnitine       | LCMS (+)  | 6          |        | ns | *   | ** |                           |                            |
|                              |           | HMDB000482 |        |    |     |    |                           |                            |
| N2,N2-Dimethylguanosine      | LCMS (+)  | 4          |        | ns | *   | ** |                           |                            |

|                                 |           |            |        |    |     |    |                           |         |                 |              |
|---------------------------------|-----------|------------|--------|----|-----|----|---------------------------|---------|-----------------|--------------|
|                                 |           | HMDB001332 |        |    |     |    |                           |         |                 |              |
| 2-Octenoylcarnitine             | LCMS (+)  | 4          |        | ns | ns  | ** |                           |         |                 |              |
|                                 |           | HMDB024058 |        |    |     |    |                           |         |                 |              |
| cis-4-Decenoylcarnitine         | LCMS (+)  | 5          |        | ns | ns  | ** |                           |         |                 |              |
|                                 | LCMS (-), | HMDB000015 |        |    |     |    | Transfer of Acetyl Groups | SMP0046 |                 | apples,      |
| Malic acid                      | GCMS      | 6          | C00149 | ns | ns  | ** | into Mitochondria         | 6       |                 | grapes       |
|                                 |           | HMDB000075 |        |    |     |    |                           |         |                 |              |
| Hexanoylcarnitine               | LCMS (+)  | 6          |        | ns | ns  | ** |                           |         |                 |              |
|                                 |           | HMDB003407 |        |    |     |    |                           |         |                 | black mus-   |
| Sinigrin                        | LCMS (-)  | 0          | C08427 | ns | ns  | ** |                           |         |                 | tard, cab-   |
|                                 |           | HMDB001039 |        |    |     |    |                           |         |                 | bage, Brus-  |
| LysoPC(20:4(5Z,8Z,11Z,14Z)/0:0) | LCMS (+)  | 5          | C04230 | ns | ns  | ** |                           |         |                 | sels sprouts |
|                                 | LCMS (-), | HMDB000080 |        |    |     |    |                           |         |                 |              |
| Myristic acid                   | GCMS      | 6          | C06424 | ns | *** | *  | Fatty Acid Biosynthesis   | SMP0045 | saturated fatty | animal and   |
|                                 | LCMS (+), | HMDB000185 |        |    |     |    |                           | 6       | acid            | vegetable    |
| Acetaminophen                   | GCMS      | 9          | C06804 | ns | **  | *  |                           |         |                 | fats         |
|                                 |           | HMDB001037 |        |    |     |    | Arachidonic Acid Metabo-  | SMP0007 |                 | drug, pain-  |
| LysoPC(14:0/0:0)                | LCMS (+)  | 9          | C04230 | ns | **  | *  | lism                      | 5       |                 | killer       |
|                                 |           | HMDB000088 |        |    |     |    |                           |         |                 |              |
| Valine                          | GCMS      | 3          | C00183 | ns | **  | *  |                           |         | essential amino |              |
|                                 |           |            |        |    |     |    |                           |         | acids           |              |
| LysoPC(0:0/14:0)                | LCMS (+)  |            | C04230 | ns | **  | *  | Glycerophospholipid me-   | SMP0003 |                 |              |
|                                 |           | HMDB009465 |        |    |     |    | tabolism                  | 9       |                 |              |
| Pyroglutamylvaline              | LCMS (+)  | 1          |        | ns | *   | *  |                           |         |                 |              |

|                                             |          |   |        |    |    |   |                                                      |              |                                          |                                                    |
|---------------------------------------------|----------|---|--------|----|----|---|------------------------------------------------------|--------------|------------------------------------------|----------------------------------------------------|
| Glycine                                     | GCMS     | 3 | C00037 | ns | *  | * | Glutathione Metabolism                               | SMP0001<br>5 | non-essential<br>amino acid<br>essential |                                                    |
| alpha-Linolenic acid                        | LCMS (-) | 8 | C06427 | ns | *  | * | Alpha Linolenic Acid and<br>Linoleic Acid Metabolism | SMP0001<br>8 | omega-3 fatty<br>acid                    | vegetable<br>oils, nuts                            |
| L-Palmitoylcarnitine                        | LCMS (+) | 2 | C02990 | ns | *  | * | Fatty acid Metabolism                                | SMP0005<br>1 |                                          |                                                    |
| LysoPC(20:2(11Z,14Z)/0:0)                   | LCMS (+) | 2 | C04230 | ns | *  | * |                                                      |              |                                          |                                                    |
| LysoPC(0:0/16:1)                            | LCMS (+) |   | C04230 | ns | *  | * | Glycerophospholipid me-<br>tabolism                  | SMP0003<br>9 |                                          |                                                    |
| LysoPC(22:6(4Z,7Z,10Z,13Z,16Z,19Z)/<br>0:0) | LCMS (+) | 4 | C04230 | ns | ns | * |                                                      |              |                                          |                                                    |
| Butyrylcarnitine                            | LCMS (+) | 3 | C02862 | ns | ns | * |                                                      |              |                                          |                                                    |
| Pyroglutamic acid                           | GCMS     | 7 | C01879 | ns | ns | * | Glutathione Metabolism                               | SMP0001<br>5 |                                          | urinebi-<br>omarker for<br>cheese con-<br>sumption |
| Cervonylcarnitine                           | LCMS (+) | 0 |        | ns | ns | * |                                                      |              |                                          |                                                    |
| Eicosapentaenoic acid                       | LCMS (-) | 9 | C06428 | ns | ns | * | Alpha Linolenic Acid and<br>Linoleic Acid Metabolism | SMP0001<br>8 | important PUFA                           | fish oils                                          |
| Abietic acid                                | LCMS (-) |   |        | ns | ns | * |                                                      |              |                                          |                                                    |
| 3-Hydroxyisovaleric acid                    | LCMS (-) | 4 |        | ns | ns | * |                                                      |              |                                          | prolonged<br>consumption                           |

|                                         |          |   |        |    |     |    |                                               |              |                          |  |  |                                                            |
|-----------------------------------------|----------|---|--------|----|-----|----|-----------------------------------------------|--------------|--------------------------|--|--|------------------------------------------------------------|
|                                         |          |   |        |    |     |    |                                               |              |                          |  |  | of raw egg-whites<br>fish, red meat, beans, dairy products |
| L-Glutamine                             | LCMS (+) | 1 | C00064 | ns | ns  | *  | Urea Cycle                                    | SMP0005<br>9 | non-essential amino acid |  |  |                                                            |
|                                         |          |   |        |    |     |    |                                               |              |                          |  |  |                                                            |
| 2-Oxovaleric acid                       | LCMS (-) | 5 | C06255 | ns | ns  | *  |                                               |              |                          |  |  |                                                            |
|                                         |          |   |        |    |     |    |                                               |              |                          |  |  |                                                            |
| Uracil                                  | LCMS (+) | 0 | C00106 | ns | ns  | *  | Pyrimidine Metabolism                         | SMP0004<br>6 |                          |  |  |                                                            |
|                                         |          |   |        |    |     |    |                                               |              |                          |  |  |                                                            |
| Succinylcarnitine                       | LCMS (+) | 7 |        | ns | ns  | *  |                                               |              |                          |  |  |                                                            |
|                                         |          |   |        |    |     |    |                                               |              |                          |  |  |                                                            |
| Hippuric acid                           | LCMS (-) | 4 | C01586 | ns | ns  | *  |                                               |              |                          |  |  | tea, wine, fruit juices                                    |
|                                         |          |   |        |    |     |    |                                               |              |                          |  |  |                                                            |
| Inositol, scyllo-                       | GCMS     | 8 | C06153 | ns | ns  | *  |                                               |              |                          |  |  | coconut palm                                               |
|                                         |          |   |        |    |     |    |                                               |              |                          |  |  |                                                            |
| 3-Hydroxybutyrylcarnitine               | LCMS (+) | 7 |        | ns | ns  | *  |                                               |              |                          |  |  |                                                            |
|                                         |          |   |        |    |     |    |                                               |              |                          |  |  |                                                            |
| Caprylic acid                           | LCMS (-) | 2 | C06423 | ** | *** | ns | Beta Oxidation of Very Long Chain Fatty Acids | SMP0005<br>2 | saturated fatty acid     |  |  | coconuts additive and gelling agent in jello or gelatins   |
|                                         |          |   |        |    |     |    |                                               |              |                          |  |  |                                                            |
| Adipic acid                             | GCMS     | 8 | C06104 | *  | **  | ns |                                               |              |                          |  |  |                                                            |
|                                         |          |   |        |    |     |    |                                               |              |                          |  |  |                                                            |
| Chenodeoxycholic acid glycine conjugate | LCMS (-) | 7 | C05466 | ns | **  | ns | Bile Acid Biosynthesis                        | SMP0003<br>5 |                          |  |  |                                                            |

|                              |          |            |        |    |    |    |                           |         |              |
|------------------------------|----------|------------|--------|----|----|----|---------------------------|---------|--------------|
|                              |          | HMDB000019 |        |    |    |    |                           | SMP0005 |              |
| Inosine                      | LCMS (-) | 5          | C00294 | ns | ** | ns | Purine Metabolism         | 0       |              |
| Eicosanedioic acid           | LCMS (-) |            |        | ns | ** | ns |                           |         |              |
|                              |          | HMDB000070 |        |    |    |    |                           |         |              |
| Glycoursodeoxycholic acid    | LCMS (-) | 8          |        | ns | *  | ns |                           |         |              |
|                              |          | HMDB000025 |        |    |    |    | Starch and Sucrose Metab- | SMP0005 |              |
| Sucrose                      | GCMS     | 8          | C00089 | ns | *  | ns | olism                     | 8       | sugarcane,   |
| Eicosadieneoylcarnitine      | LCMS (+) |            |        | ns | *  | ns |                           |         | sugar beet   |
|                              |          | HMDB000646 |        |    |    |    |                           |         |              |
| Linoleylcarnitine            | LCMS (+) | 9          |        | ns | *  | ns |                           |         |              |
|                              |          | HMDB001038 |        |    |    |    |                           |         |              |
| LysoPC(18:3(9Z,12Z,15Z)/0:0) | LCMS (+) | 8          | C04230 | ns | *  | ns |                           |         |              |
|                              |          | HMDB000282 |        |    |    |    |                           |         |              |
| Theobromine                  | LCMS (+) | 5          | C07480 | ns | *  | ns |                           |         | cacao bean   |
|                              |          | HMDB000013 |        |    |    |    |                           |         |              |
| Guanosine                    | LCMS (+) | 3          | C00387 | ns | *  | ns | Purine Metabolism         | 0       | leeks, gar-  |
|                              |          | HMDB000066 |        |    |    |    | Starch and Sucrose Metab- | SMP0005 | lic, black-  |
| Fructose                     | GCMS     | 0          | C02336 | ns | *  | ns | olism                     | 8       | eyed peas    |
|                              |          | HMDB001038 |        |    |    |    |                           |         | honey, tree  |
| LysoPC(16:1(9Z)/0:0)         | LCMS (+) | 3          | C04230 | ns | *  | ns |                           |         | fruits, ber- |
|                              |          |            |        |    |    |    |                           |         | ries         |
|                              |          |            |        |    |    |    |                           |         |              |
| LysoPC(0:0/15:0)             | LCMS (+) |            | C04230 | ns | *  | ns | Glycerophospholipid me-   | SMP0003 |              |
|                              |          |            |        |    |    |    | tabolism                  | 9       |              |

## CONSORT 2010 Flow Diagram

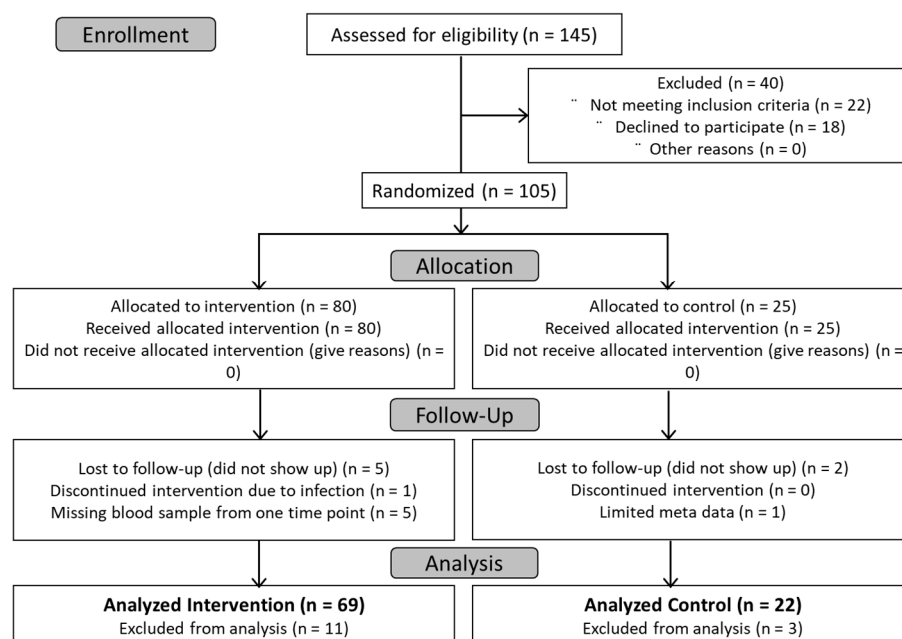

Supplementary Figure 2. CONSORT 2010 Flow Diagram.

## Flow chart over inclusion and exclusion criteria

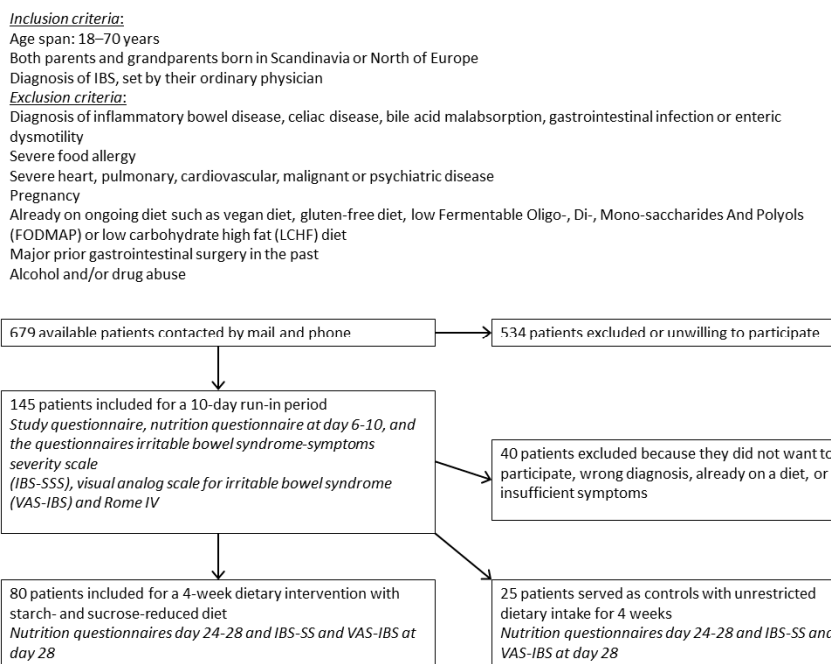

Supplementary Figure 3. Flow chart over inclusion and exclusion criteria.

**Supplementary Table 3.** Recommendations for berries, fruit, legumes, and vegetable intake according to starch- and sucrose-reduced diet (SSRD). The dietary recommendations were downloaded from [www.sucroseintolerance.com/choosing-your-foods/](http://www.sucroseintolerance.com/choosing-your-foods/) [22]. \*excess intake can cause bloating/flatulence in all individuals.

### **Berries and fruits**

#### **Well tolerated**

Avocado  
Blackberries  
Blueberries  
Boysenberries  
Cherries  
Cranberries  
Currants  
Figs  
Gooseberries  
Grapes  
Kiwi fruits  
Lemons  
Limes  
Loganberries  
Olives  
Papayas  
Pears  
Pomegranates  
Prunes  
Raspberries  
Rhubarbs  
Strawberries

#### **Tolerated by some**

Persimmons  
Plums  
Raisins  
Watermelon

#### **Not tolerated**

Apples  
Apricots  
Bananas  
Cantaloupe  
Dates  
Grapefruits  
Guava  
Honeydew melon  
Mangos  
Nectarines  
Oranges  
Passion fruits  
Peaches  
Pineapples  
Tangelos  
Tangerines

### **Vegetables and legumes**

#### **Well tolerated**

Alfafa sprouts  
Artichokes\*  
Arugulas  
Asparagus\*  
Bamboo shoots  
Bok choy  
Broccoli\*  
Brussels sprouts\*  
Cabbages\*  
Cauliflower\*

#### **Tolerated by some**

Edamame soybeans  
Jicamas  
Leeks  
Okra  
Pumpkins  
Snow peas  
Tempeh  
Tofu  
Yellow wax beans

#### **Not tolerated**

Beets  
Black beans  
Black-eyed peas  
Butternut  
Carrots  
Cassavas  
Chickpeas  
Corn  
Garlic  
Green peas



Celery  
Chard  
Chicories  
Chives  
Collard greens  
Cress  
Cucumbers  
Eggplants  
Endive  
Green beans  
Kale  
Lettuces  
Mung bean sprout  
Mushrooms  
Mustard green  
Peppers  
Radishes  
Spaghetti squash  
Spinach  
Tomatoes  
Turnips  
Yellow squash  
Zucchini

Lentils  
Kidney beans  
Lima beans  
Navy beans  
Onion  
Parsnips  
Pinto beans  
Potatoes  
Soybeans  
Split peas  
Sweet potatoes  
Yams
